# Supplementary material for: Cancer-associated fibroblasts secrete CSF3 to promote TNBC progression via enhancing PGM2L1-dependent glycolysis reprogramming
Source: Springer Nature journal article supplement (doi:10.1038/s41419-025-07580-6), 2025-04-04
Supplement: MOESM1 [file 41419_2025_7580_MOESM1_ESM.pdf]

## **Supplementary materials**

### **Cancer-associated fibroblasts secrete CSF3 to promote TNBC progression via enhancing PGM2L1-dependent glycolysis reprogramming**

Wenqi Qin<sup>1\*</sup>, Bing Chen<sup>2\*</sup>, Xin Li<sup>1</sup>, Wenjing Zhao<sup>2</sup>, Lijuan Wang<sup>2</sup>, Ning Zhang<sup>1</sup>,  
Xiaolong Wang<sup>1</sup>, Dan Luo<sup>1</sup>, Yiran Liang<sup>1</sup>, Yaming Li<sup>1</sup>, Xi Chen<sup>1</sup>, Tong Chen<sup>1</sup> and  
Qifeng Yang<sup>1,2,3#</sup>

#### **Affiliations**

<sup>1</sup> Department of Breast Surgery, General Surgery, Qilu Hospital of Shandong University,  
Wenhua Xi Road No. 107, Jinan, Shandong, 250012, P.R. China.

<sup>2</sup> Biological Resource Center, Qilu Hospital of Shandong University, Jinan, Shandong, 250012,  
P.R. China.

<sup>3</sup> Research Institute of Breast Cancer, Shandong University, Jinan, Shandong, 250012, P.R.  
China.

<sup>#</sup> Correspondence: Qifeng Yang, E-mail: qifengy\_sdu@163.com

<sup>\*</sup> Wenqi Qin and Bing Chen contributed equally to this work.

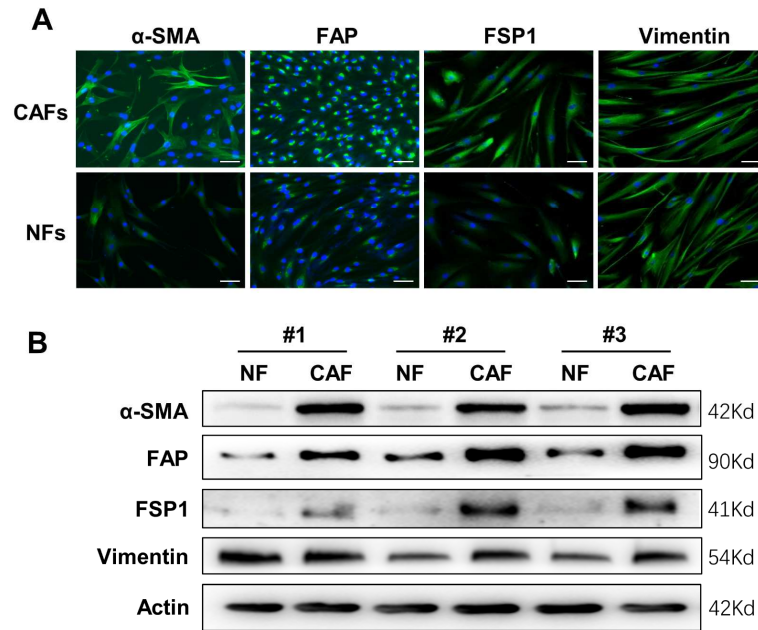

**Fig S1. The characteristics of paired NFs and CAFs were identified.**

(A, B) Immunofluorescent staining (A) and western blot (B) of  $\alpha$ -SMA, FAP, FSP1 and vimentin expression in NFs and CAFs. Scale bars, 100  $\mu$ m.

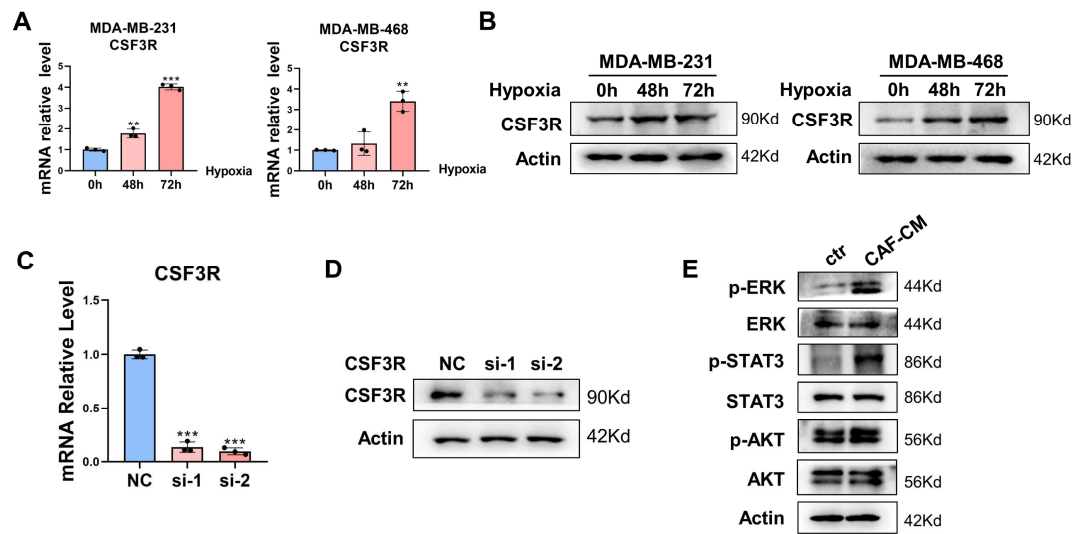

**Fig S2. CSF3R is upregulated under hypoxic conditions.**

(A, B) The mRNA and protein level of CSF3R in TNBC cells increased with persistent. (n=3). (C, D) CSF3R was effectively silenced in TNBC cells by transfecting siRNA (n=3). (E) ERK, STAT3 and AKT pathways in MDA-MB-231 cells were activated by hypoxic CAF-CM. The data are presented as the mean  $\pm$  SD. \*\*  $P < 0.01$ , \*\*\*  $P < 0.001$ .

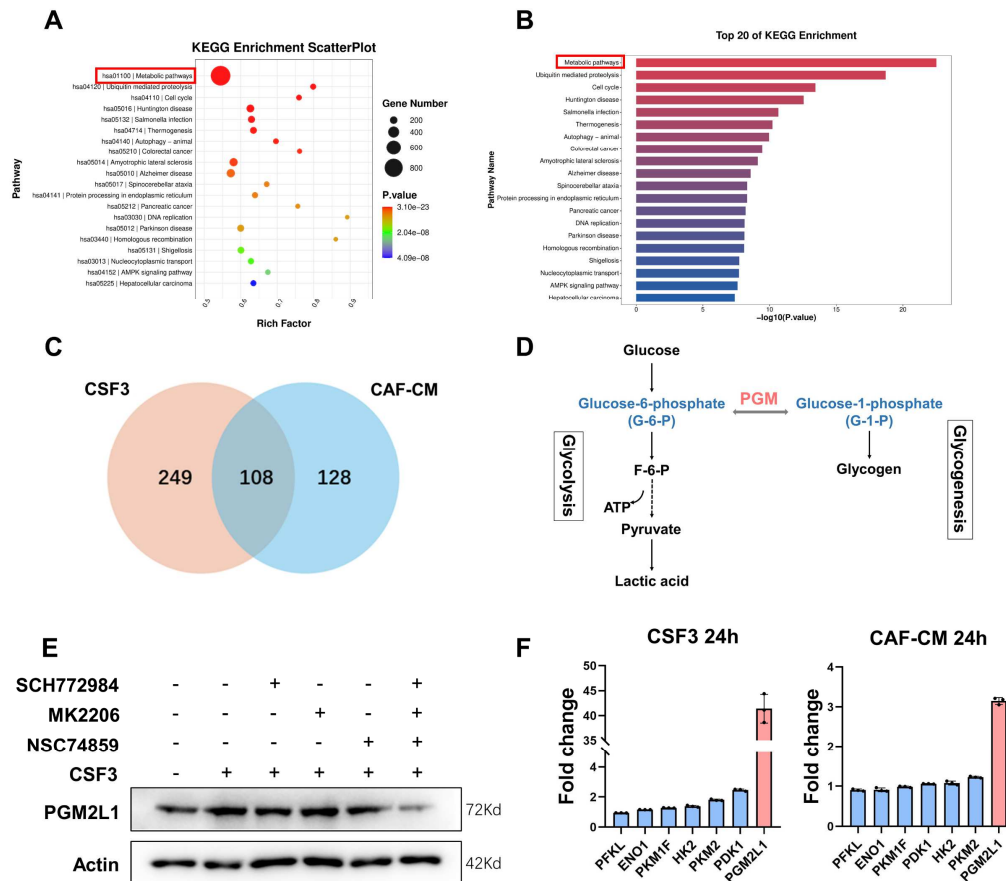

**Fig S3. CSF3 increases PGM2L1 in TNBC cells.**

**A, B** Top 20 KEGG enrichment pathway of the RNA-Seq data. (Fold change of  $> 1.5$ ,  $P$  value  $< 0.05$ ). **C** Venn diagram of upregulated metabolic-related genes in both CSF3 and CAF-CM groups. **D** Diagram of PGM regulating glucose metabolism. **E** The protein level of PGM2L1 was influenced by pathway inhibitors. **F** The mRNA expression level of key glycolysis-related genes by qRT-PCR ( $n=3$ ). The data are presented as the mean  $\pm$  SD.

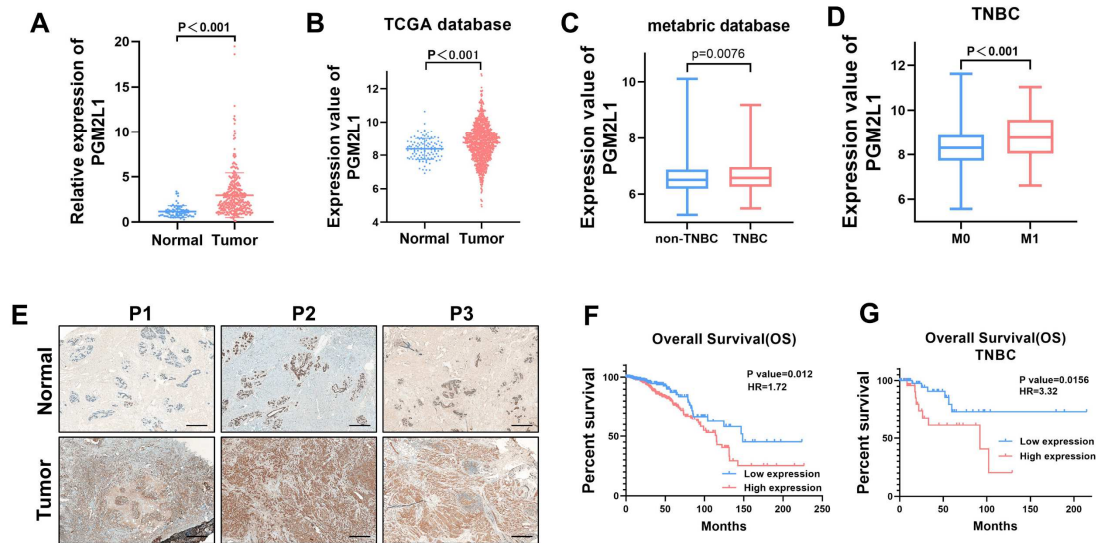

**Fig S4. Clinical significance of PGM2L1 in breast cancer.**

**A, B** The expression level of PGM2L1 was higher in breast cancer tissues compared to normal tissues according to Qilu cohort (**A**, N=73, T=313) and TCGA database (**B**, N=112, T=1073). **C** The comparison of PGM2L1 level between non-TNBC and TNBC (non-TNBC=1661, TNBC=319). **D** The comparison of PGM2L1 level between non-metastasis and metastasis (M<sub>0</sub>=478, M<sub>1</sub>=317). **E** Immunohistochemistry of PGM2L1 in TNBC and normal tissues. Scale bars, 500 μm. **F, G** The relationship between PGM2L1 expression and overall survival in breast cancer with Kaplan-Meier survival analysis. Log-rank test.

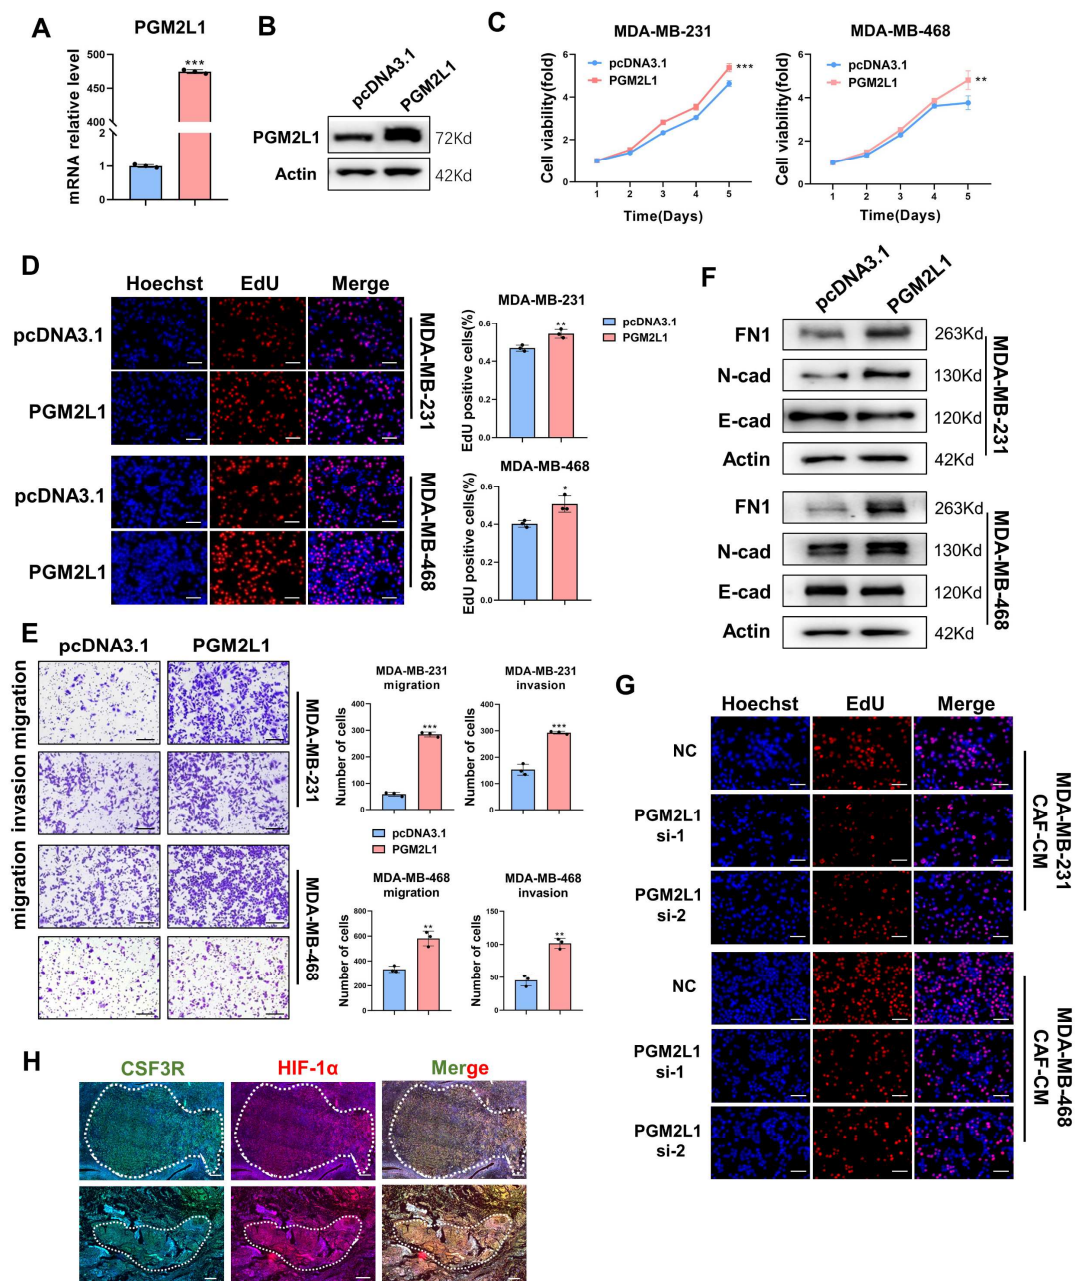

**Fig S5. PGM2L1 overexpression promotes the proliferation, migration and invasion of TNBC cells under hypoxia.**

**A, B** Transfection efficiency of PGM2L1-ove plasmid was detected by qRT-PCR (**A**,  $n=3$ ) and western blot (**B**). **C, D** The proliferative ability of TNBC cells overexpressing PGM2L1 was assessed by MTT (**C**,  $n=4$ ) and EdU (**D**,  $n=3$ ) assays. Scale bars, 100  $\mu$ m. **E** Transwell assay to assess the migration and invasion abilities of TNBC cells transfecting with PGM2L1-ove plasmid ( $n=3$ ). Scale bars, 200  $\mu$ m. **F** The level of EMT-maker proteins was examined by western blot. **G** Representative images of EdU assays

to evaluate the proliferative abilities of TNBC cells treated with hypoxic CAF-CM following PGM2L1 silencing. Scale bars, 100  $\mu\text{m}$ . **H** Fluorescent immunohistochemical staining of the expression of CSF3R and HIF-1 $\alpha$  in TNBC tissues. Scale bars, 100  $\mu\text{m}$ . The data are presented as the mean  $\pm$  SD. \*  $P < 0.05$ , \*\*  $P < 0.01$ , \*\*\*  $P < 0.001$ .



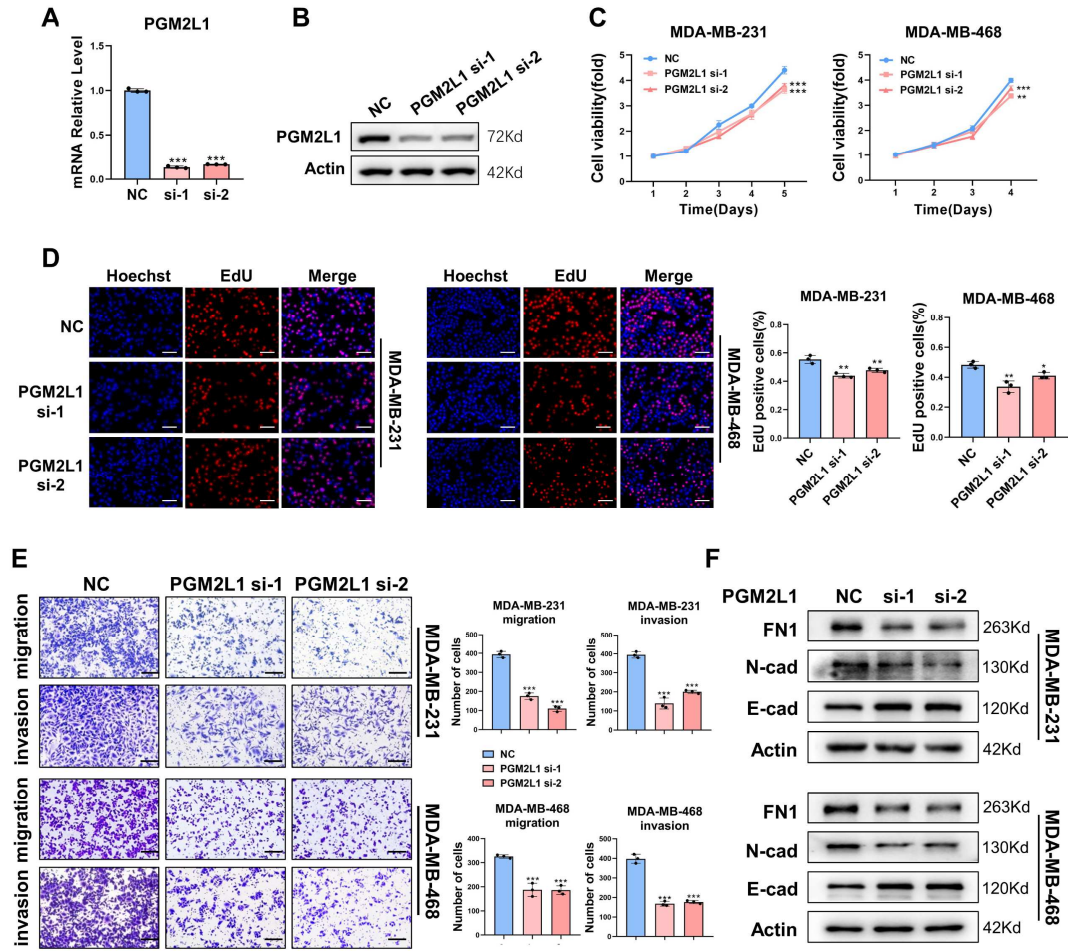

**Fig S6. PGM2L1 silencing impairs the proliferation, migration and invasion of TNBC cells under hypoxia.**

**A, B** Transfection efficiency of PGM2L1 siRNA was detected by qRT-PCR (A,  $n=3$ ) and western blot (B). **C, D** The proliferative ability of TNBC cells transfected silencing PGM2L1 was assessed by MTT (C,  $n=4$ ) and EdU (D,  $n=3$ ) assays. Scale bars, 100  $\mu\text{m}$ . **E** Transwell assay to assess the migration and invasion abilities of TNBC cells transfected with PGM2L1 siRNA ( $n=3$ ). Scale bars, 200  $\mu\text{m}$ . **F** The level of EMT-maker proteins was examined by western blot. The data are presented as the mean  $\pm$  SD. \*  $P < 0.05$ , \*\*  $P < 0.01$ , \*\*\*  $P < 0.001$ .



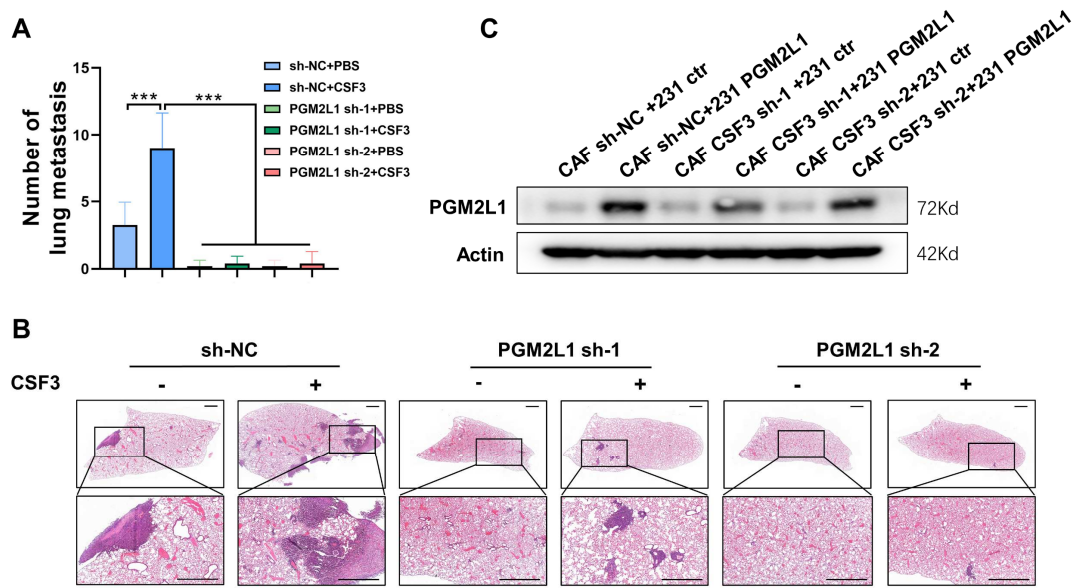

**Fig S7. Combined effects of CSF3 and PGM2L1 on tumor growth and lung metastasis in the Balb/c-Nude mice.**

**A** The number of lung metastatic nodules in mice from different groups (n=5 mice). **B** H&E staining images of lung tissues. Scale bars, 1000 μm. **C** The protein level of PGM2L1 in each group was examined by western blot. The data are presented as the mean ± SD. \*\*\*  $P < 0.001$ .

**Table 1. siRNA used for transfection**

| Name              | Sense (5'-3')         | Anti-sense(5'-3')     |
|-------------------|-----------------------|-----------------------|
| HIF-1 $\alpha$ si | AGUCACCACAGGACAGUAUTT | AUACUGUCCUGUGGUGACUTT |
| CSF3R             | GGACCCAGGAAUCUAUCAUTT | AUGAUAGAUUCCUGGGUCCTT |
| si-1              |                       |                       |
| CSF3R             | GACGGAUCCAAGGUUAUGUTT | ACAUAACCUUGGAUCCGUCTT |
| si-2              |                       |                       |
| PGM2L1            | GAACAGAACCAAAGAUAAATT | UUUAUCUUUGGUUCUGUUCTT |
| si-1              |                       |                       |
| PGM2L1            | GGAGAAUGGUUGUUGGAAATT | UUUCCAACAACCAUUCUCCTT |
| si-2              |                       |                       |
| NC                | UUCUCCGAACGUGUCACGUTT | ACGUGACACGUUCGGAGAATT |

**Table 2. Primer sequences used for qRT-PCR**

| Genes          | Forward sequence (5'-3') | Reverse sequence (5'-3') |
|----------------|--------------------------|--------------------------|
| $\beta$ -actin | CACTGTGCCCATCTACGAG      | AATGTACGCACGATTTCC       |
| CSF3           | CGACTTTGCCACCACCATCT     | GTAGAACGCGGTACGACACC     |
| HIF-1 $\alpha$ | TATGAGCCAGAAGAACTTTTAGGC | CACCTCTTTTGGCAAGCATCCTG  |
| CSF3R          | CTTGTGGCCTATAACTCAGCC    | CCCACTCAATCACATAGCCCT    |
| PGM2L1         | TTACTGCCTCTCACAACCGC     | GCGGGCTGGTATCCACTAAA     |
| DPYD           | CGGCGGACATCGAGAGTAT      | TCCTCGCTCACCAAGAGTCG     |
| GALNT4         | TGGCCTATATCTTCGTGGAGC    | CTGGAGTTTGCTGGCTTTCC     |
| GLCE           | TGAAACAGCAGAAGACAGAGACA  | GCCACATTCGCCATAAGCAC     |
| ATP6V1A        | TGGAGGGTGACATGGCTACT     | GAGGGGTTTACCAGTGCGAA     |
| INPP4B         | TGGCTGGCTGCAACGATTT      | CTCTTCTCATGCAATCCAGCG    |
| PLD1           | AAAATCTGGACACGCGGGAA     | GACAGCCGGAGAGATACGTC     |
| IPMK           | TCAGCAACAGGTCAGCAAGT     | AGCTTCTTCCGTAATGCTGGT    |
| MECOM          | TCCGGTACAGCAACATCGTC     | TGCCATTCAATTCTCTCCTCCAC  |
| GALNT5         | TTGGAACATACGACCCTGGC     | CCACCACACATCCACACCTT     |

|       |                       |                      |
|-------|-----------------------|----------------------|
| PFKL  | GGGAGGTGAGAACATCAAGCA | CCAATGATAGTGCCGCCCAG |
| ENO1  | AACCCAAAGAGGATCGCCAA  | CCCGAACGATGAGACACCAT |
| PKM1F | CAGCACCTGATAGCTCGTGA  | TGAGGCTCGCACAAGTTCT  |
| PDK1  | GCCACTATGGAACACCATGC  | CCTCATTACCCAGCGTGACA |
| HK2   | GCCCGCCAGAAGACATTAGA  | GCTCAGACCTCGCTCCATTT |
| PKM2  | AATCACGCTGGATAACGCCT  | TCGGCACCTTTCTGCTTCAC |

**Table 3. Antibodies used for western blot and IHC**

| Name          | Supplier                 | Catalog#   | Application            |
|---------------|--------------------------|------------|------------------------|
| $\alpha$ -SMA | Proteintech <sup>a</sup> | 55135-1-AP | WB (1:500) IHC (1:300) |
| FAP           | Affinity <sup>b</sup>    | AF5344     | WB (1:500)             |
| FSP1          | Abclonal <sup>c</sup>    | A1631      | WB (1:500)             |
| FN1           | Proteintech              | 15613-1-AP | WB (1:500)             |
| Vimentin      | Servicebio <sup>d</sup>  | GB11192    | WB (1:500)             |
| CSF3R         | Proteintech              | 18310-1-AP | WB (1:200)             |
| p-ERK         | Affinity                 | AF1015     | WB (1:1000)            |
| ERK           | Affinity                 | AF0155     | WB (1:1000)            |
| p-AKT         | Affinity                 | AF0016     | WB (1:500)             |
| AKT           | PTM BIO <sup>e</sup>     | PTM-5191   | WB (1:500)             |
| p-STAT3       | Affinity                 | AF3293     | WB (1:500)             |
| STAT3         | Affinity                 | AF6294     | WB (1:500)             |
| N-cadherin    | Proteintech              | 22018-1-AP | WB (1:500)             |
| E-cadherin    | Proteintech              | 20874-1-AP | WB (1:500)             |
| PGM2L1        | Proteintech              | 13942-1-AP | WB (1:500) IHC (1:100) |
| Ki-67         | Proteintech              | 28074-1-AP | IHC (1:500)            |
| Actin         | Affinity                 | T0022      | WB (1:1000)            |

<sup>a</sup> Proteintech, Chicago, IL, USA

<sup>b</sup> Affinity, Changzhou, China

<sup>c</sup> Abclonal, Wuhan, China

<sup>d</sup> Servicebio, Wuhan, China

<sup>e</sup> PTM BIO, Hangzhou, China

**Table 4. Reagents used in the experiment**

| Name            | Supplier                      | Catalog   | Application |
|-----------------|-------------------------------|-----------|-------------|
| CSF3            | R&D System <sup>a</sup>       | 214-CS    | 50ng/ml     |
| 2-DG            | Med Chem Express <sup>b</sup> | HY-13966  | 500μM       |
| ERK inhibitor   | Med Chem Express              | SCH772984 | 2.5μM       |
| AKT inhibitor   | Med Chem Express              | MK-2206   | 5μM         |
| Stat3 inhibitor | Med Chem Express              | NSC 74859 | 5μM         |

<sup>a</sup> R&D System, Minneapolis, MN, USA

<sup>b</sup> Med Chem Express, Rahway, NJ, USA
